# Supplementary material for: In Vitro and In Silico Studies on Cytotoxic Properties of Oxythiamine and 2′-Methylthiamine
Source: MDPI journal article supplement (doi:10.3390/ijms25084359), 2024-04-15
Supplement: s1 [file s1]

# SUPPORTING INFORMATION

## *In vitro* and *in silico* studies on cytotoxic properties of oxythiamine and 2'-methylthiamine

Marta Malinowska<sup>1,†</sup>, Magdalena Czerniecka<sup>2,3†,\*</sup>, Izabella Jastrzebska<sup>1</sup>, Artur Ratkiewicz<sup>1,\*</sup>, Adam Tylicki<sup>2</sup> and Natalia Wawrusiewicz-Kurylonek<sup>4</sup>

<sup>1</sup> Faculty of Chemistry, University of Białystok, Białystok, Poland

<sup>2</sup> Faculty of Biology, University of Białystok, Białystok, Poland

<sup>3</sup> Laboratory of Tissue Culture, Department of Biology, University of Białystok, Ciołkowskiego 1J, 15-245 Białystok, Poland

<sup>4</sup> Department of Clinical Genetics, Medical University of Białystok, Waszyngtona 13, 15-089 Białystok, Poland

† These authors contributed equally to this work

\* Correspondence: [m.siemieniuk@uwb.edu.pl](mailto:m.siemieniuk@uwb.edu.pl) (M.C.), [artrat@uwb.edu.pl](mailto:artrat@uwb.edu.pl) (A. R.)

## Copies of NMR spectra of new compounds

|                                                                                                          |           |
|----------------------------------------------------------------------------------------------------------|-----------|
| <b>S1</b> – $^1\text{H}$ NMR spectrum of 4- <i>Amino-2-methylpyrimidine- 5-carbonitrile</i> (1).....     | <b>3</b>  |
| <b>S2</b> – $^{13}\text{C}$ NMR spectrum of 4- <i>Amino-2-methylpyrimidine- 5-carbonitrile</i> (1).....  | <b>4</b>  |
| <b>S3</b> – $^1\text{H}$ NMR spectrum of 4- <i>Amino-2-methylpyrimidine-5-carboxaldehyde</i> (2).....    | <b>5</b>  |
| <b>S4</b> – $^{13}\text{C}$ NMR spectrum of 4- <i>Amino-2-methylpyrimidine-5-carboxaldehyde</i> (2)..... | <b>6</b>  |
| <b>S5</b> – $^1\text{H}$ NMR spectrum of (4- <i>amino-2-methylpyrimidin-5-yl</i> )methanol (3).....      | <b>7</b>  |
| <b>S6</b> – $^{13}\text{C}$ NMR spectrum of (4- <i>amino-2-methylpyrimidin-5-yl</i> )methanol (3).....   | <b>8</b>  |
| <b>S7</b> – $^1\text{H}$ NMR spectrum of 2'- <i>methylthiamine</i> .....                                 | <b>9</b>  |
| <b>S8</b> – $^{13}\text{C}$ NMR spectrum of 2'- <i>methylthiamine</i> .....                              | <b>10</b> |
| <b>S9</b> – HPLC chromatogram of 2'- <i>methylthiamine</i> .....                                         | <b>11</b> |
| <b>S10</b> – ESI-HRMS of 2'- <i>methylthiamine</i> .....                                                 | <b>12</b> |
| <b>Table S1</b> .....                                                                                    | <b>13</b> |

**S1** –  $^1\text{H}$  NMR spectrum of 4- Amino-2-methylpyrimidine- 5-carbonitrile (**1**)

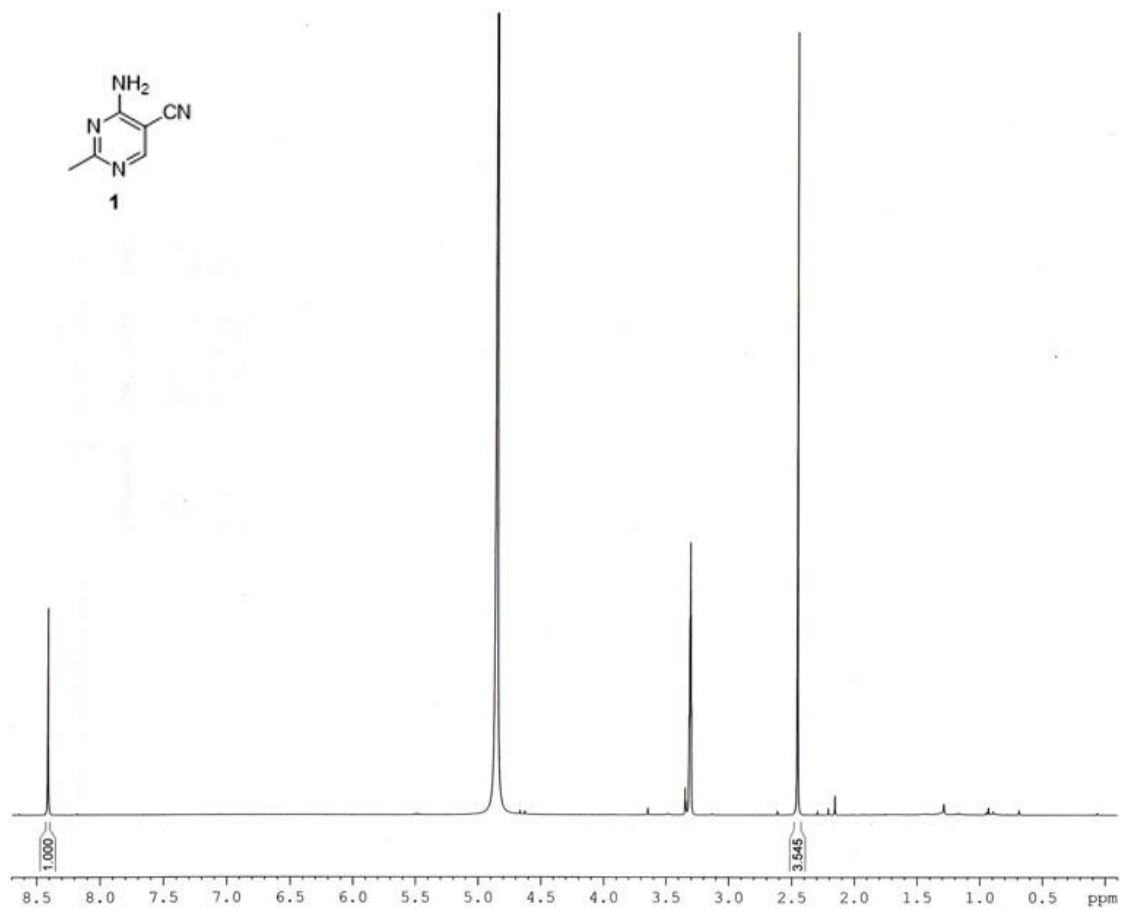

**S2** –  $^{13}\text{C}$  NMR spectrum of 4- Amino-2-methylpyrimidine- 5-carbonitrile (**1**)

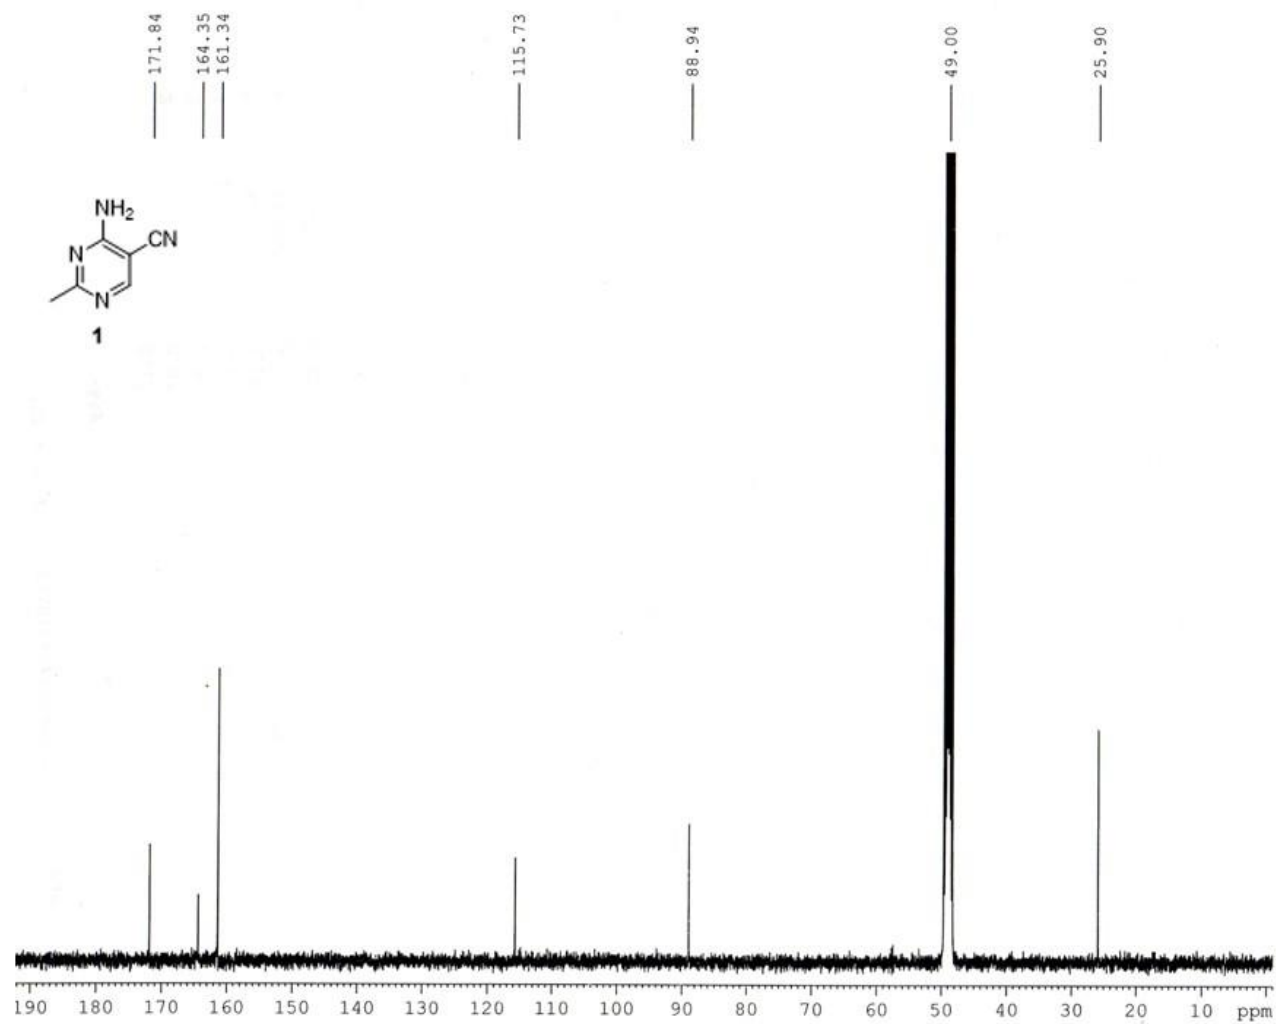

**S3** –  $^1\text{H}$  NMR spectrum of 4-Amino-2-methylpyrimidine-5-carboxaldehyde (**2**)

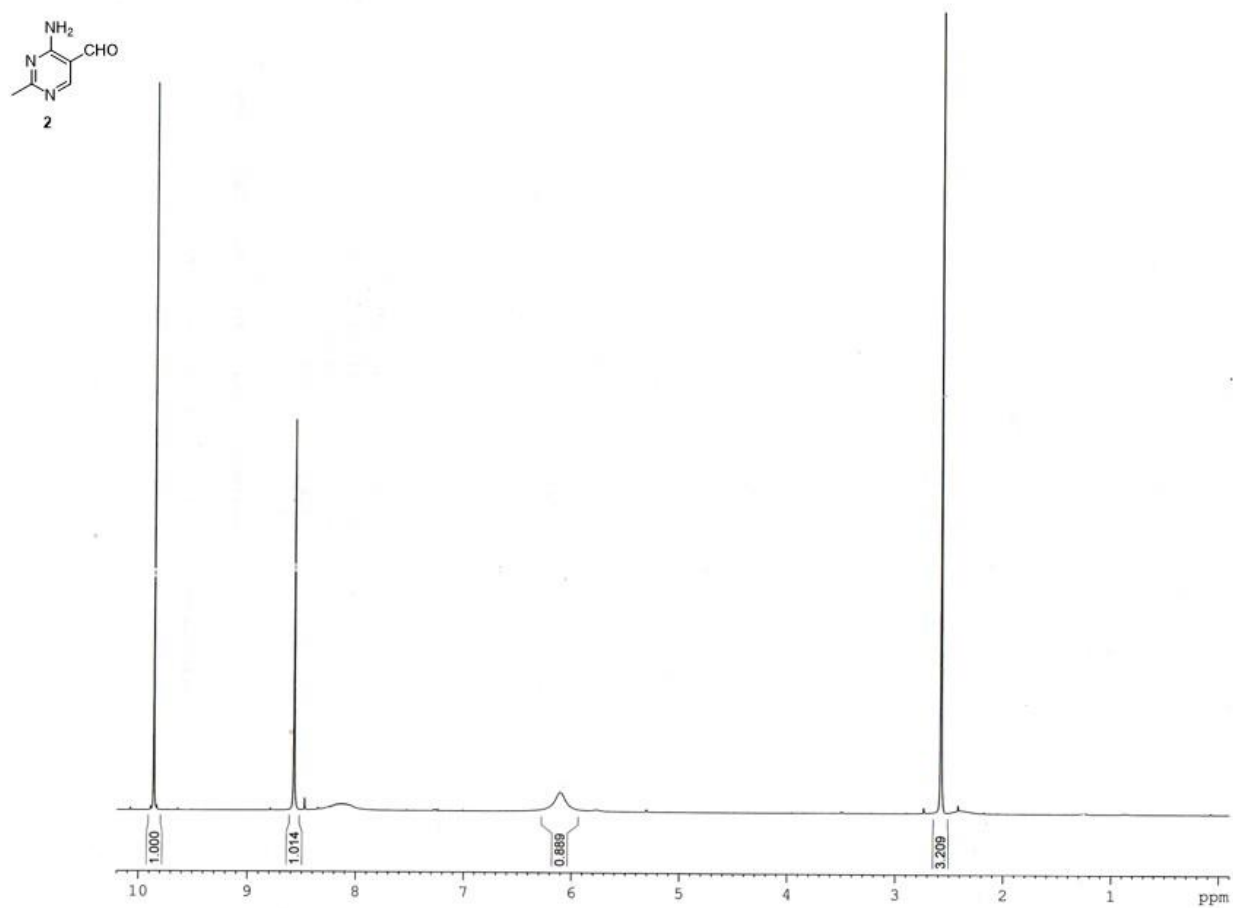

**S4** –  $^{13}\text{C}$  NMR spectrum of 4-Amino-2-methylpyrimidine-5-carboxaldehyde (**2**)

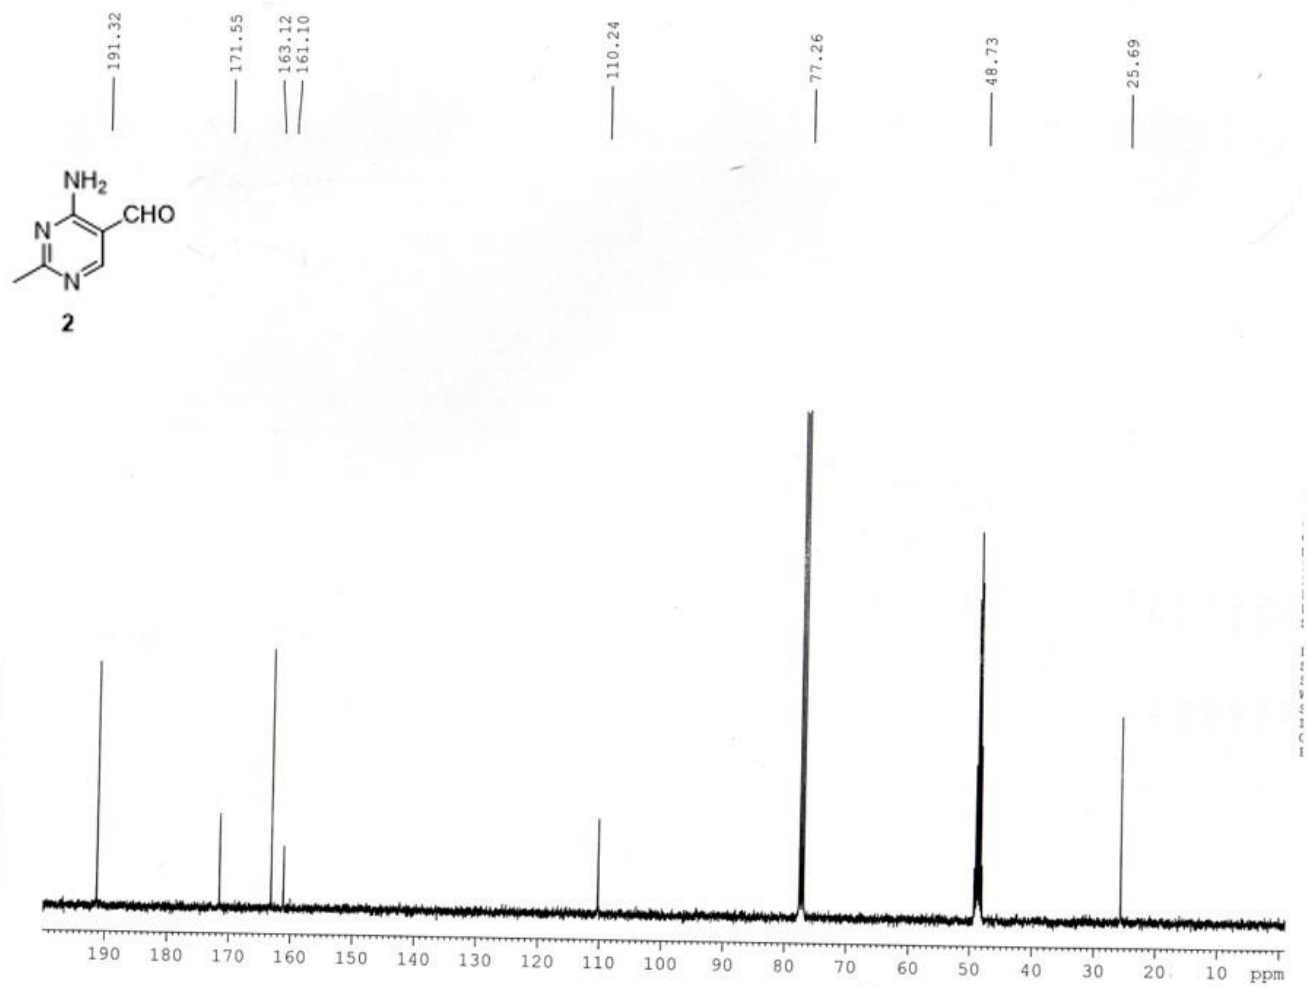

**S5** –  $^1\text{H}$  NMR spectrum of (4-amino-2-methylpyrimidin-5-yl)methanol (**3**)

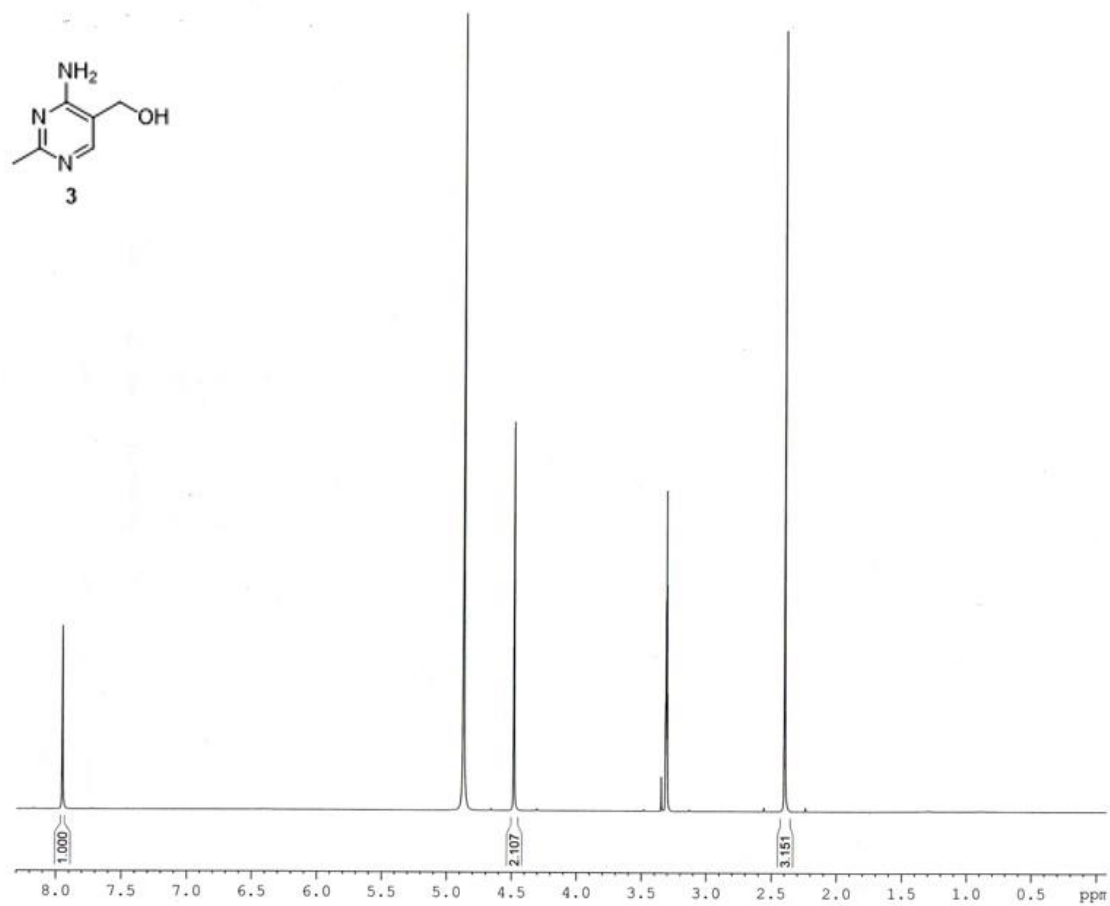

**S6** –  $^{13}\text{C}$  NMR spectrum of (4-amino-2-methylpyrimidin-5-yl)methanol (**3**)

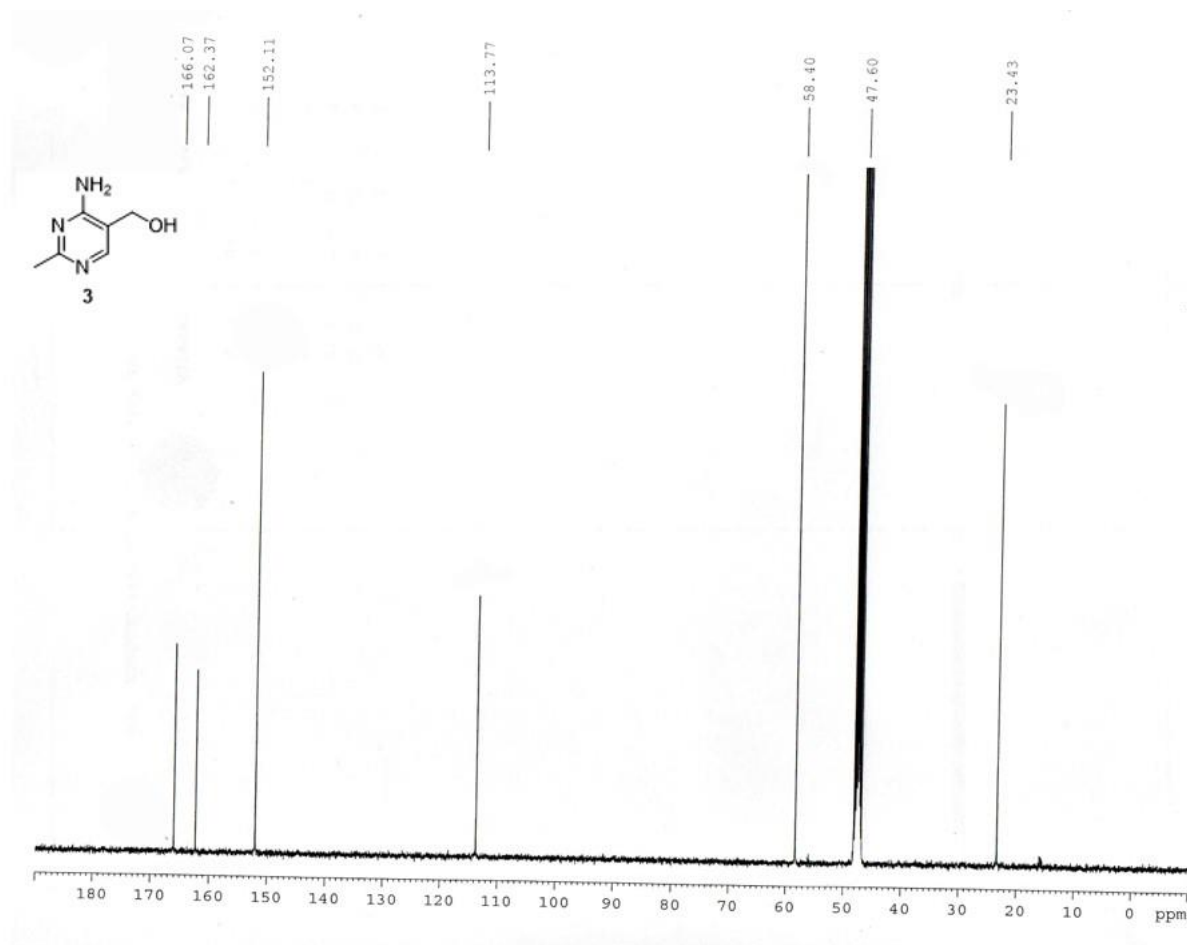



**S7** –  $^1\text{H}$  NMR spectrum of 2'-methylthiamine

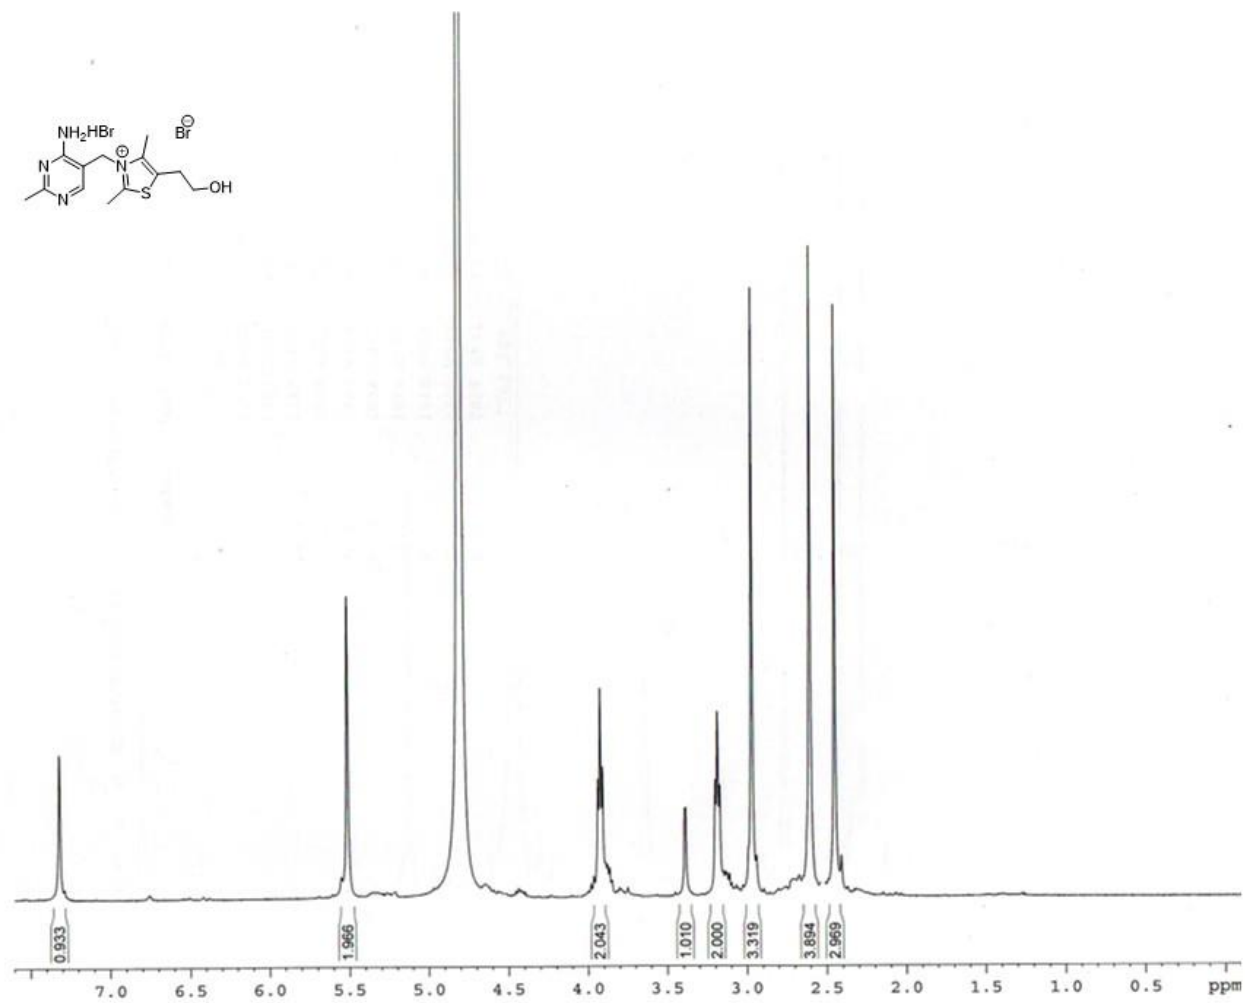

**S8** –  $^{13}\text{C}$  NMR spectrum of 2'-methylthiamine

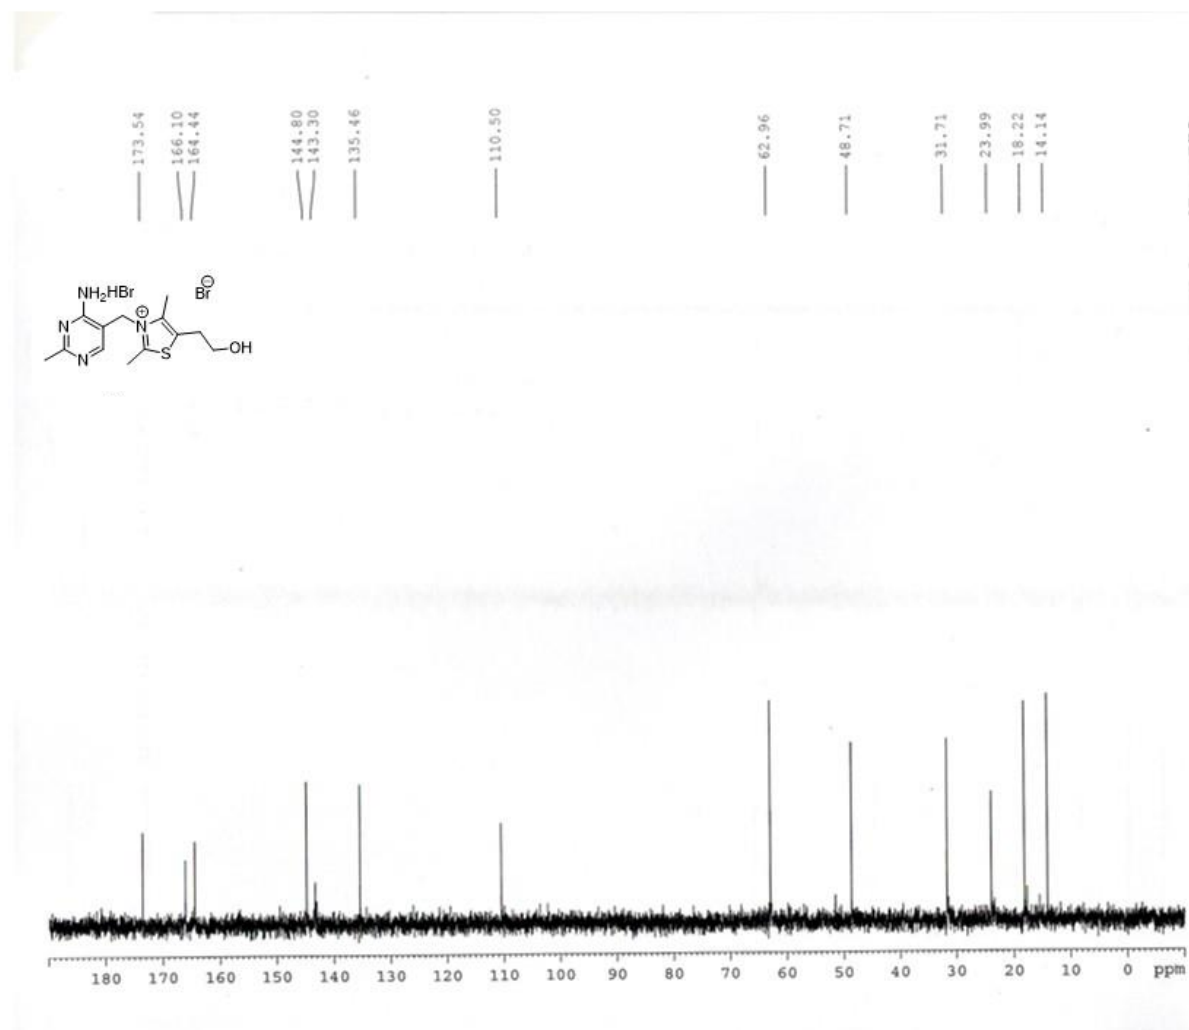

**S9** – HPLC chromatogram of 2'-methylthiamine

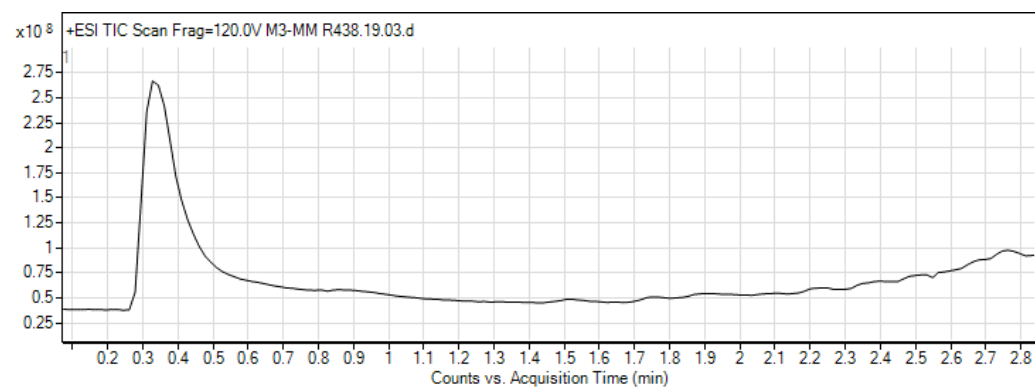

## S10 – ESI-HRMS of 2'-methylthiamine

|                               |                        |         |                 |                      |
|-------------------------------|------------------------|---------|-----------------|----------------------|
| M3-MM R438                    | Position               | P1-D3   | Instrument Name | Instrument 1         |
| Sample                        | Inj Vol                | 0.5     | InjPosition     |                      |
| z_MetodaBezKolumny1minUWAGA.m | IRM Calibration Status | Success | Data Filename   | M3-MM R438.d         |
|                               | Comment                |         | Acquired Time   | 3/16/2021 5:47:50 PM |

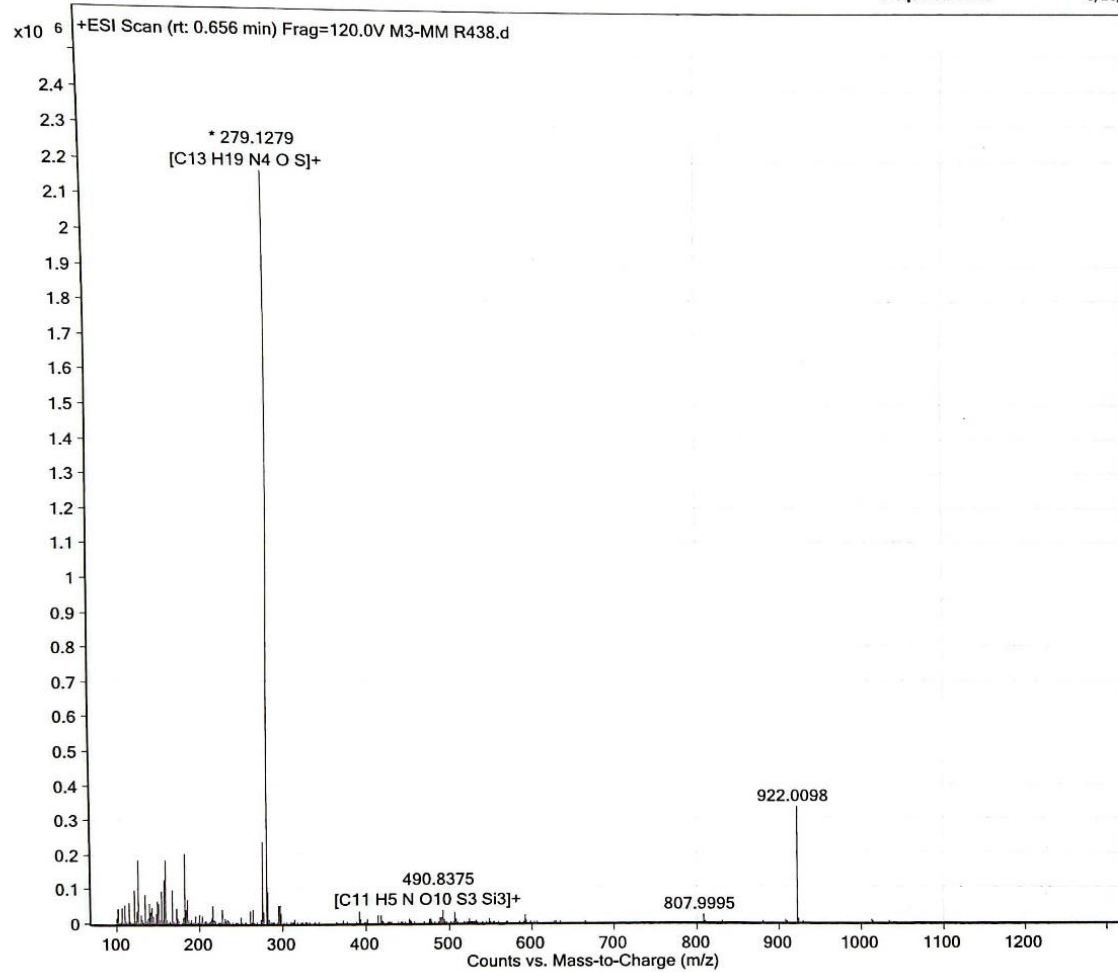

**Table S1.** Statistical parameters of 100-ns molecular dynamics simulation of OCT1 and its complexes. APO – unliganded form, TIA , MTA, OXT– complexes with thiamine, 2-methylthiamine and oxythiamine. Average - arithmetic mean, SD - standard deviation, SD/average - coefficient of variation.

### RMSD

|        | APO  | TIA  | MTA  | OXT  |
|--------|------|------|------|------|
| AVE    | 2.52 | 3.03 | 2.62 | 3.02 |
| SD     | 0.36 | 0.37 | 0.48 | 0.67 |
| SD/ave | 0.14 | 0.12 | 0.18 | 0.22 |

### SASA

|        | APO      | TIA      | MTA      | OXT      |
|--------|----------|----------|----------|----------|
| AVE    | 26229.05 | 26148.81 | 26316.52 | 26072.81 |
| SD     | 365.33   | 472.01   | 440.67   | 315.60   |
| SD/ave | 0.01     | 0.02     | 0.02     | 0.01     |

### RG

|        | APO   | TIA   | MTA   | OXT   |
|--------|-------|-------|-------|-------|
| AVE    | 27.89 | 27.61 | 27.94 | 27.45 |
| SD     | 0.21  | 0.19  | 0.22  | 0.26  |
| SD/ave | 0.01  | 0.01  | 0.01  | 0.01  |

### RMSF

|        | APO  | TIA  | MTA  | OXT  |
|--------|------|------|------|------|
| AVE    | 1.45 | 1.44 | 1.25 | 1.51 |
| SD     | 0.74 | 0.80 | 0.75 | 1.06 |
| SD/ave | 0.51 | 0.56 | 0.60 | 0.70 |
